# Supplementary material
Source: ML conference proceedings conference paper supplement (https://aclanthology.org/2022.emnlp-main.248)
Supplement: software [file 2022.emnlp-main.248.software.zip]

Archive with 4 entries (4 files):
- code.zip
- __MACOSX/._code.zip
- Counterfactual_Prompt_Learning.pdf
- __MACOSX/._Counterfactual_Prompt_Learning.pdf
